# Supplementary material for: Multifunctional Bioplastics Inspired by Wood Composition: Effect of Hydrolyzed Lignin Addition to Xylan–Cellulose Matrices
Source: PubMed Central journal article supplement (PMC7993636; doi:10.1021/acs.biomac.9b01569), 2020-01-15
Supplement: bm9b01569_si_001.pdf [file bm9b01569_si_001.pdf]

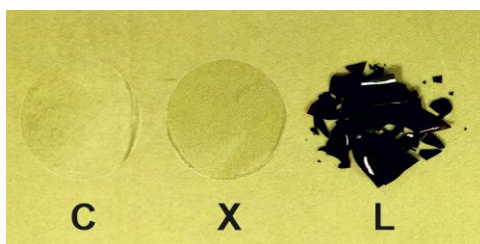

**Figure S1.** Photographs of the control materials C, X, and L, respectively. As observed, L does not form a free-standing film.

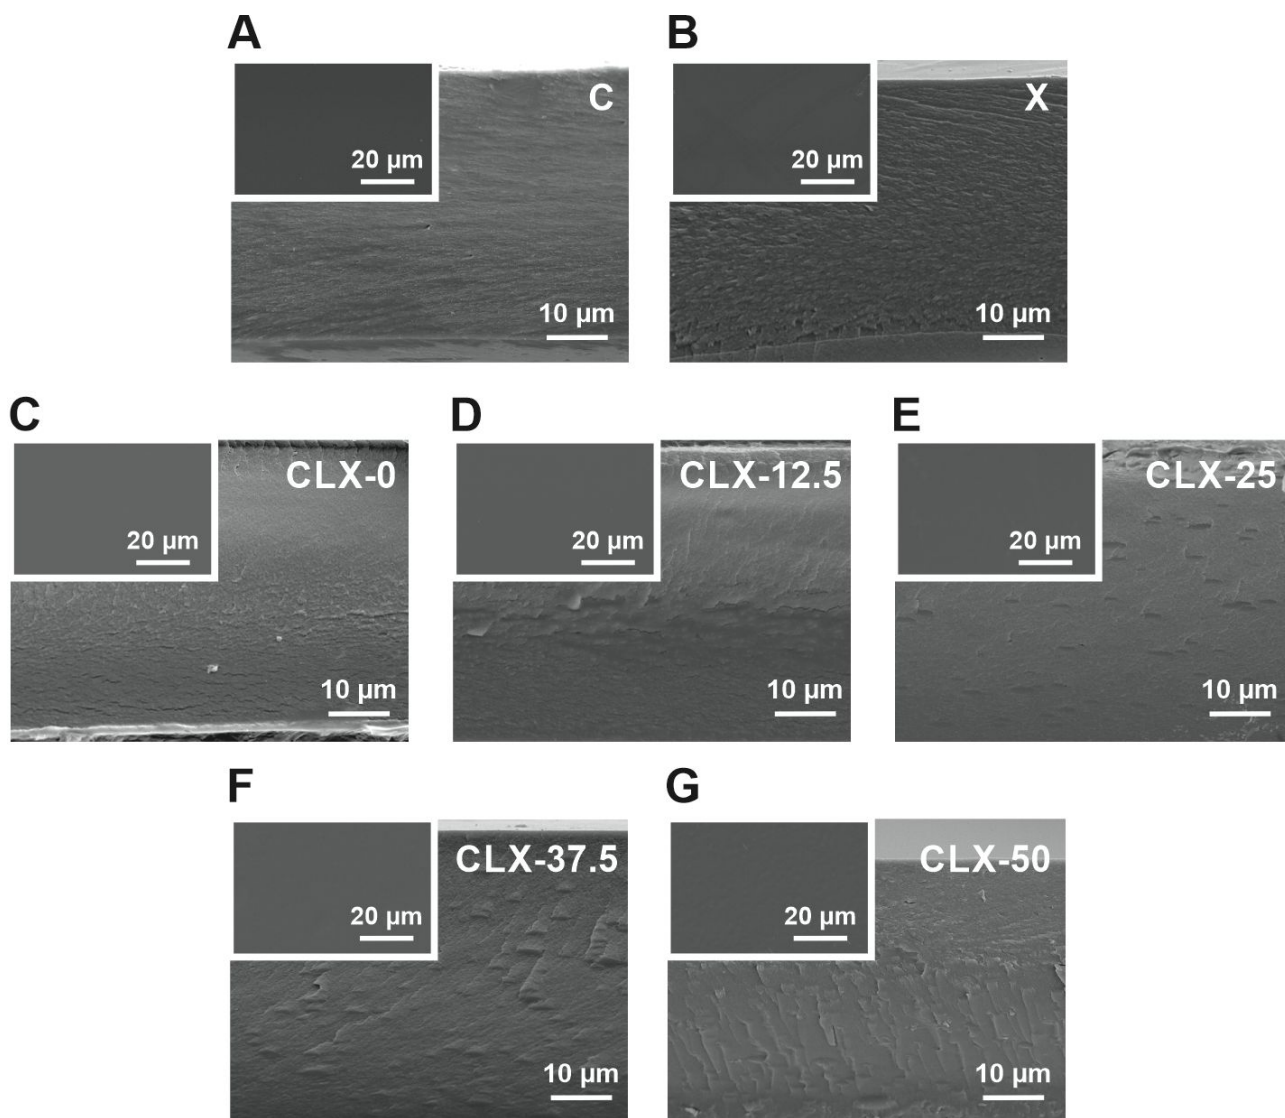

**Figure S2.** Cross-section SEM images of control samples C and X (**A**, **B**) and of lignin-based bioplastics (**C**, **D**, **E**, **F**, **G**), respectively (scale bar = 10 μm). Insets: corresponding top-views (scale bar = 20 μm).

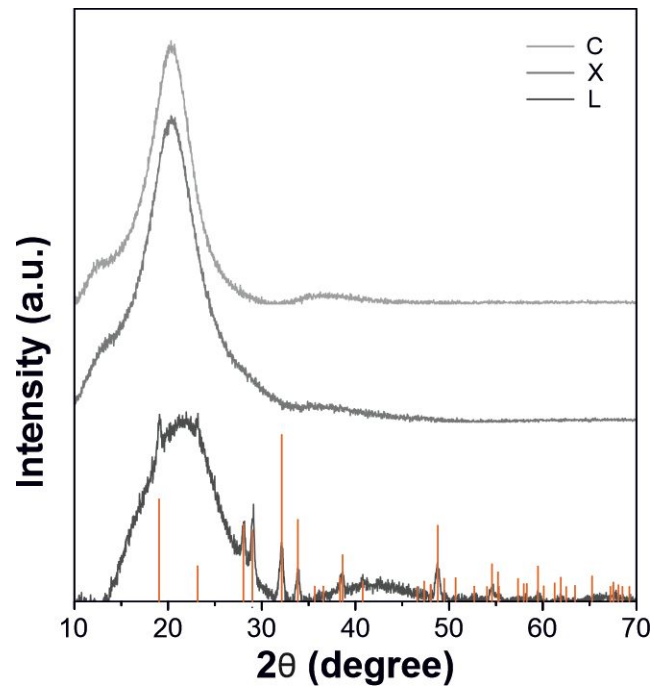

**Figure S3.** XRD patterns of C, X and L with the expected peak position reference for Na<sub>2</sub>SO<sub>4</sub> (orange, ICSD 98-000-2895).

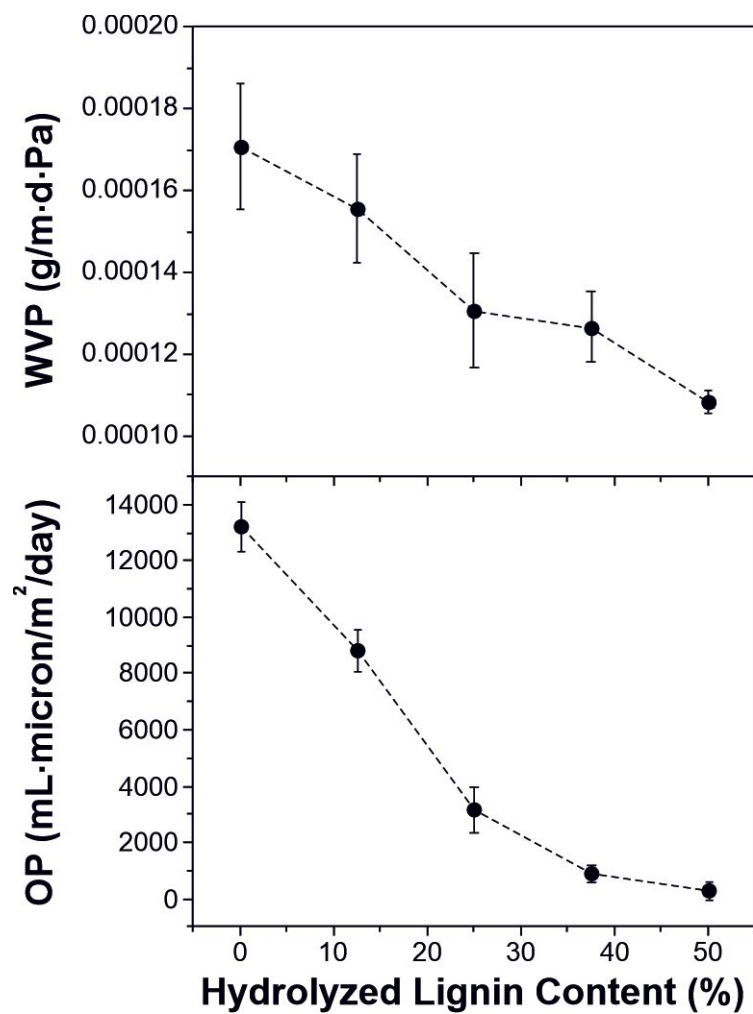

**Figure S4.** Water Vapor Permeability (WVP) and Oxygen Permeability (OP) of all the bioplastics samples.

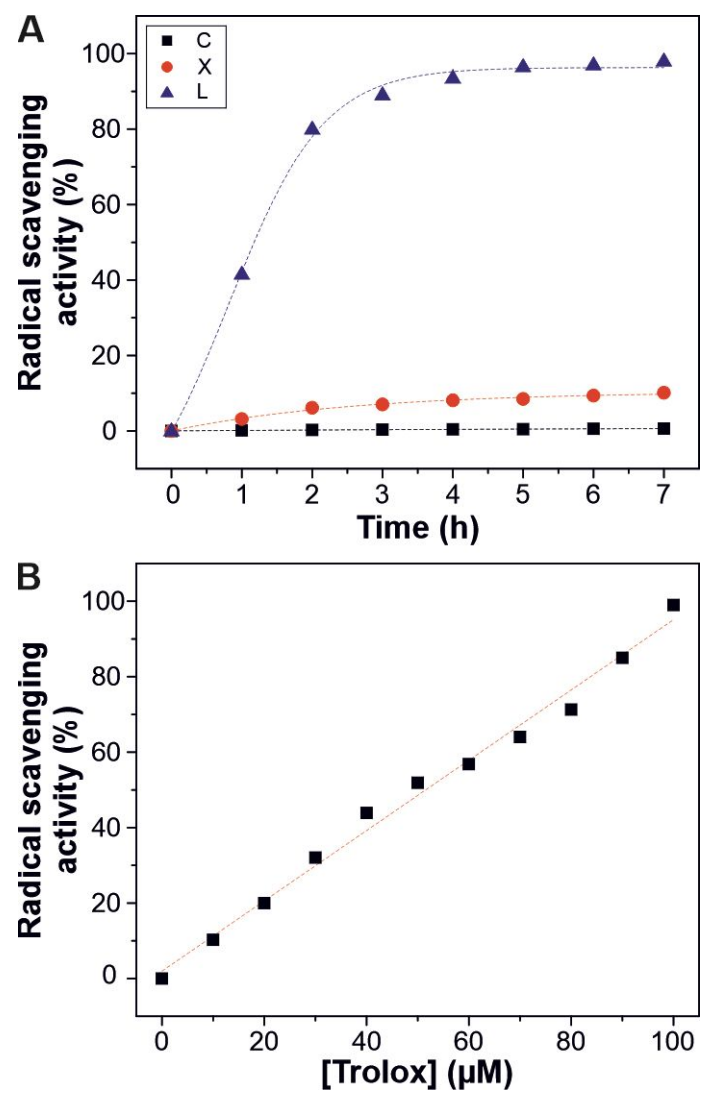

**Figure S5.** (A) antioxidant capacity of C, X and L with the time. (B) radical scavenging activity values after 7 hours for Trolox.

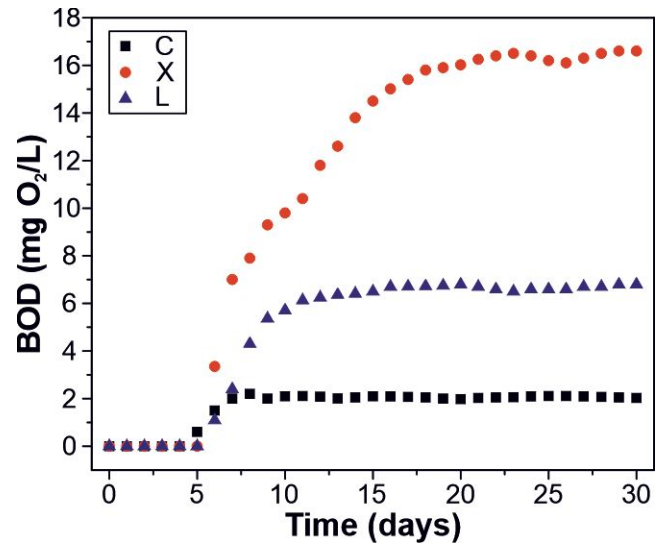

**Figure S6.** BOD data of C, X, and L.
